# Supplementary material for: Differential Localization of the Two T. brucei Poly(A) Binding Proteins to the Nucleus and RNP Granules Suggests Binding to Distinct mRNA Pools
Source: PubMed Central journal article supplement (PMC3559699; doi:10.1371/journal.pone.0054004), 2013-01-30
Supplement: pone.0054004.s002.pdf [file pone.0054004.s002.pdf]

A

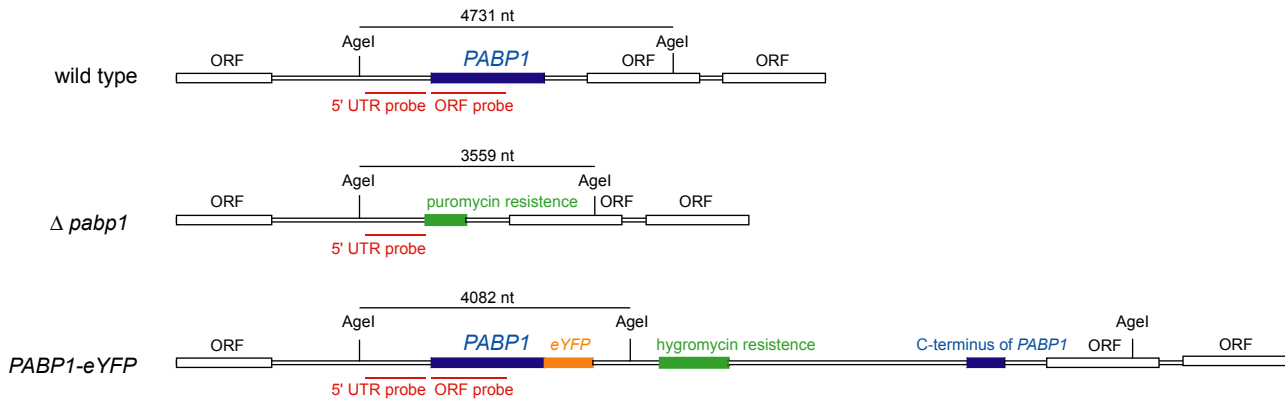

B

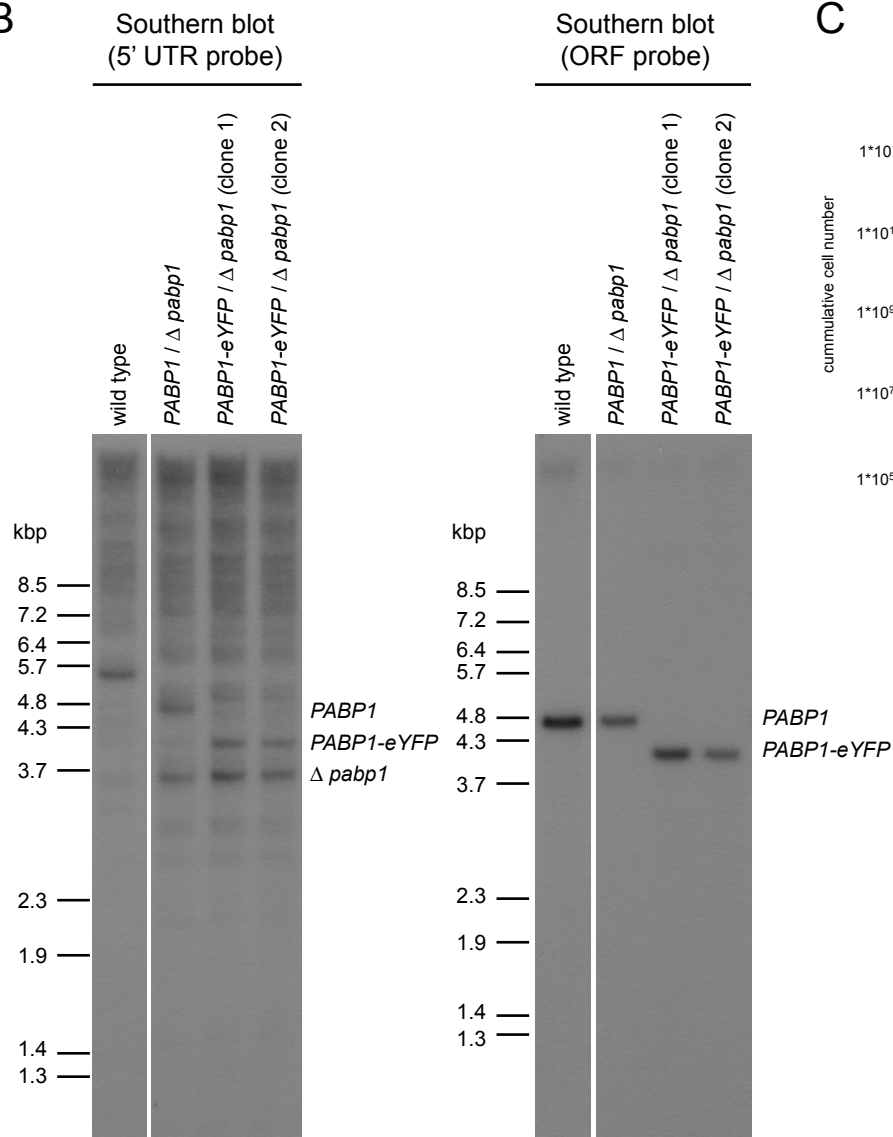

C

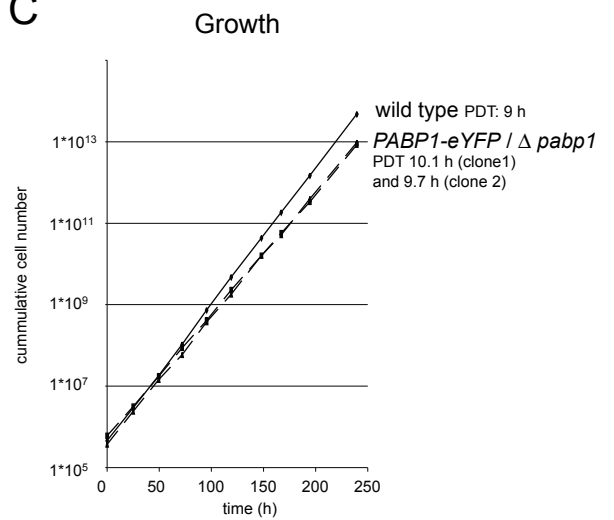

**Figure S2: Verification and analysis of PABP1-eYFP /  $\Delta$ pabp1 procyclic cells**

**A)** To-scale maps of the PABP1 genomic locus: wild type (top), after replacement of the PABP1 gene by a puromycin resistance gene ( $\Delta$ PABP1, middle) and after integration of PABP1-eYFP (bottom). Agel restriction enzyme sites and positions of the probes used for the Southern Blot in B) are indicated.

**B)** Verification of the transgenic cell lines by Southern blot.

**C)** Growth curves of wild type cells and transgenic cell lines. Population doubling times (PDT) are indicated.
