# Supplementary material for: Differential Localization of the Two T. brucei Poly(A) Binding Proteins to the Nucleus and RNP Granules Suggests Binding to Distinct mRNA Pools
Source: PubMed Central journal article supplement (PMC3559699; doi:10.1371/journal.pone.0054004), 2013-01-30
Supplement: pone.0054004.s004.pdf [file pone.0054004.s004.pdf]

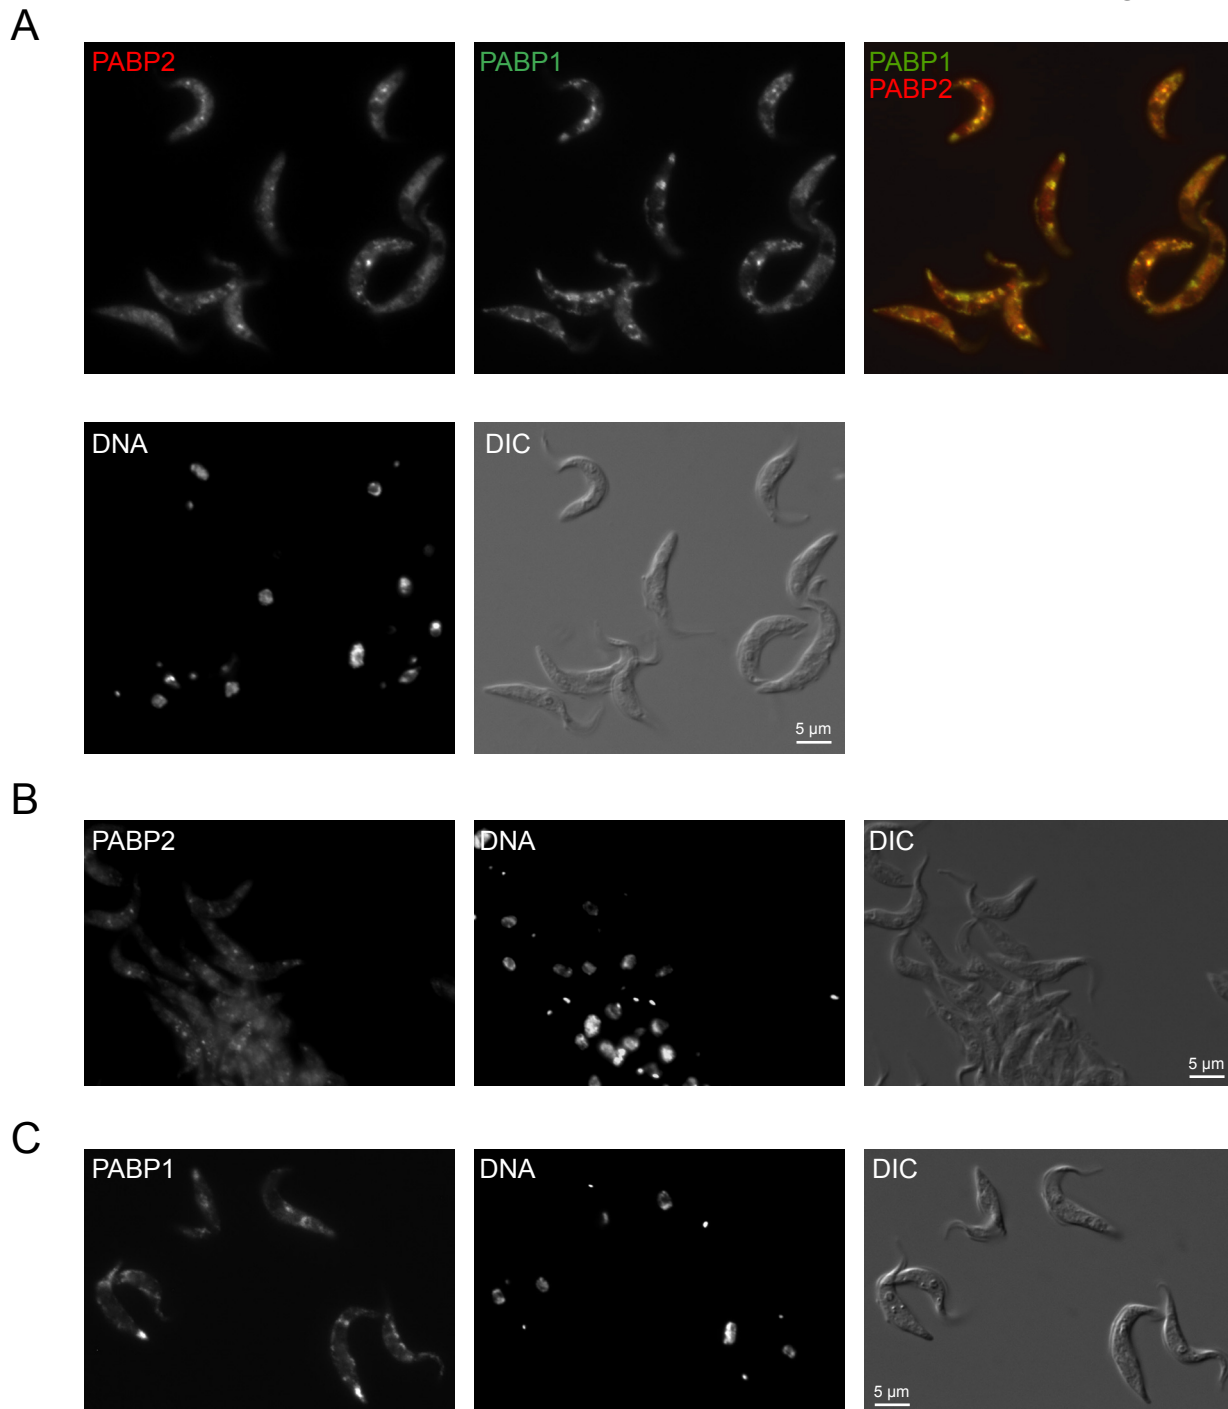

**Figure S4: Localization of PABP1 and PABP2 in response to heat shock (2 hours at 41°C)**

**A)** Cells expressing PABP1-eYFP and PABP2-mChFP

**B)** Cells expressing PABP2-eYFP

**C)** Cells expressing PABP1-eYFP

All fusion proteins were expressed from their endogenous loci.
