# Supplementary material for: Differential Localization of the Two T. brucei Poly(A) Binding Proteins to the Nucleus and RNP Granules Suggests Binding to Distinct mRNA Pools
Source: PubMed Central journal article supplement (PMC3559699; doi:10.1371/journal.pone.0054004), 2013-01-30
Supplement: pone.0054004.s005.pdf [file pone.0054004.s005.pdf]

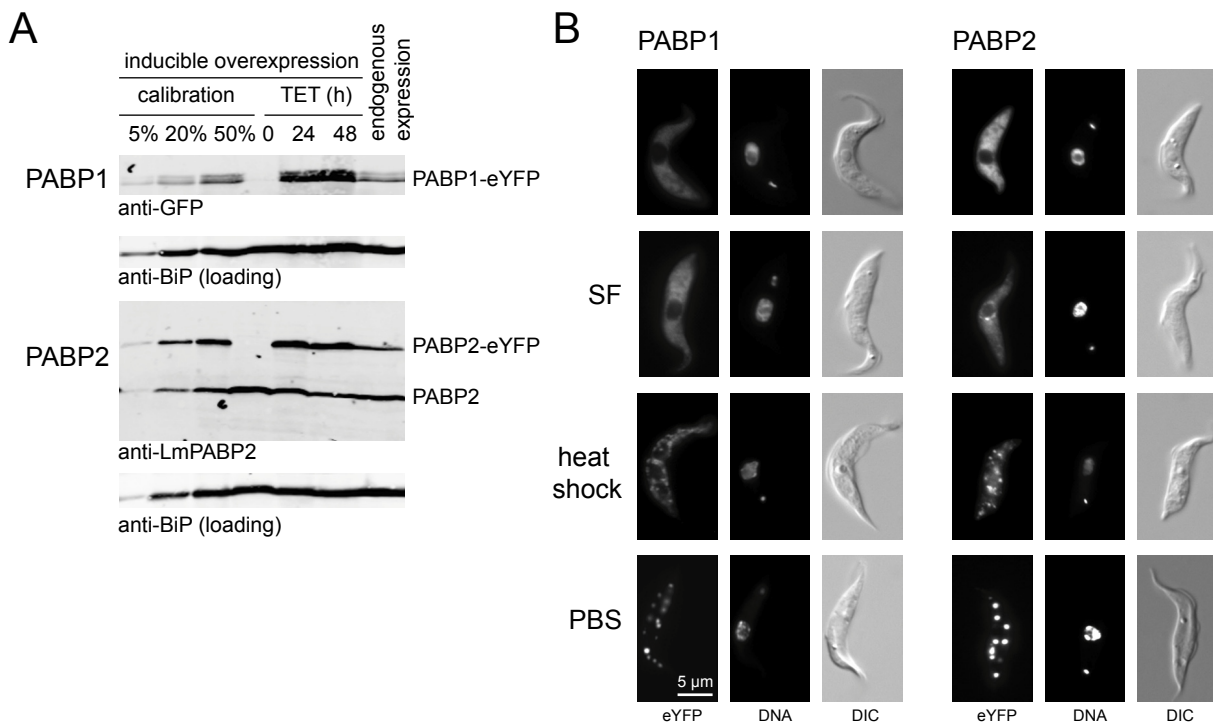

**Figure S5: Inducible over-expression of PABP1-eYFP and PABP2-eYFP**

**A)** Western blots:  $5 \times 10^6$  cell equivalents of cells induced to over-express PABP1-eYFP or PABP2-eYFP for 24 or 48 hours (TET) or cells expressing the same proteins from their endogenous loci. 5, 20 and 50% of cells lysates overexpressing the PABPs for 24 hours was loaded for calibration.

**B)** Cells over-expressing PABP1-eYFP or PABP2-eYFP were treated with sinefungin (SF) for 60 minutes, with heat shock ( $41^\circ\text{C}$  for 120 min) or incubated in PBS (120 minutes). Fluorescent microscopy images of a representative cell are shown.
