# Supplementary material for: Differential Localization of the Two T. brucei Poly(A) Binding Proteins to the Nucleus and RNP Granules Suggests Binding to Distinct mRNA Pools
Source: PubMed Central journal article supplement (PMC3559699; doi:10.1371/journal.pone.0054004), 2013-01-30
Supplement: pone.0054004.s007.pdf [file pone.0054004.s007.pdf]

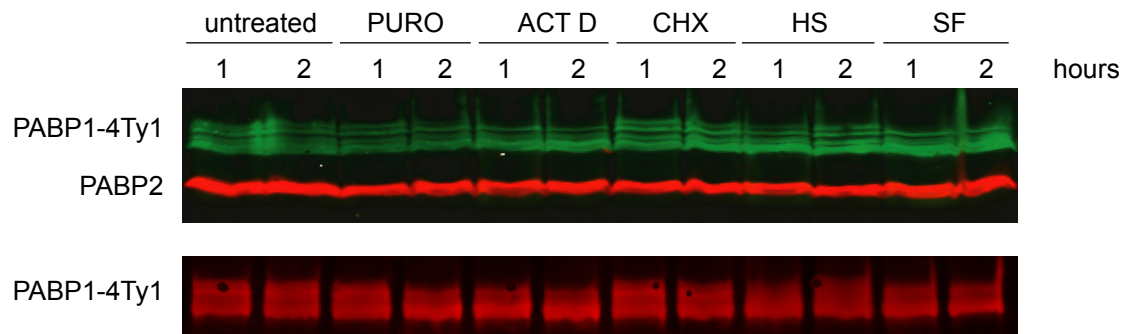

**Figure S7: Changes in PABP1 band-pattern in response to transcriptional and translational inhibitors**

Procyclic trypanosomes expressing PABP1-Ty1 from the endogenous locus were treated with puromycin (PURO; 50  $\mu\text{g/ml}$ ), actinomycin D (ACT D; 10  $\mu\text{g/ml}$ ), cycloheximide (CHX; 50  $\mu\text{g/ml}$ ), heat shock (HS; 41°C) or sinefungin (SF; 2  $\mu\text{g/ml}$ ) for the indicated times. Cells were washed in SDM79 without serum and drugs as required and prepared for western blot.  $5 \times 10^6$  cell equivalents were loaded and PABP1-4Ty1 and PABP2 were detected by quantitative western blotting. Gels of two biological replicates are shown.
