# Supplementary material for: Differential Localization of the Two T. brucei Poly(A) Binding Proteins to the Nucleus and RNP Granules Suggests Binding to Distinct mRNA Pools
Source: PubMed Central journal article supplement (PMC3559699; doi:10.1371/journal.pone.0054004), 2013-01-30
Supplement: pone.0054004.s009.pdf [file pone.0054004.s009.pdf]

Figure S9 A

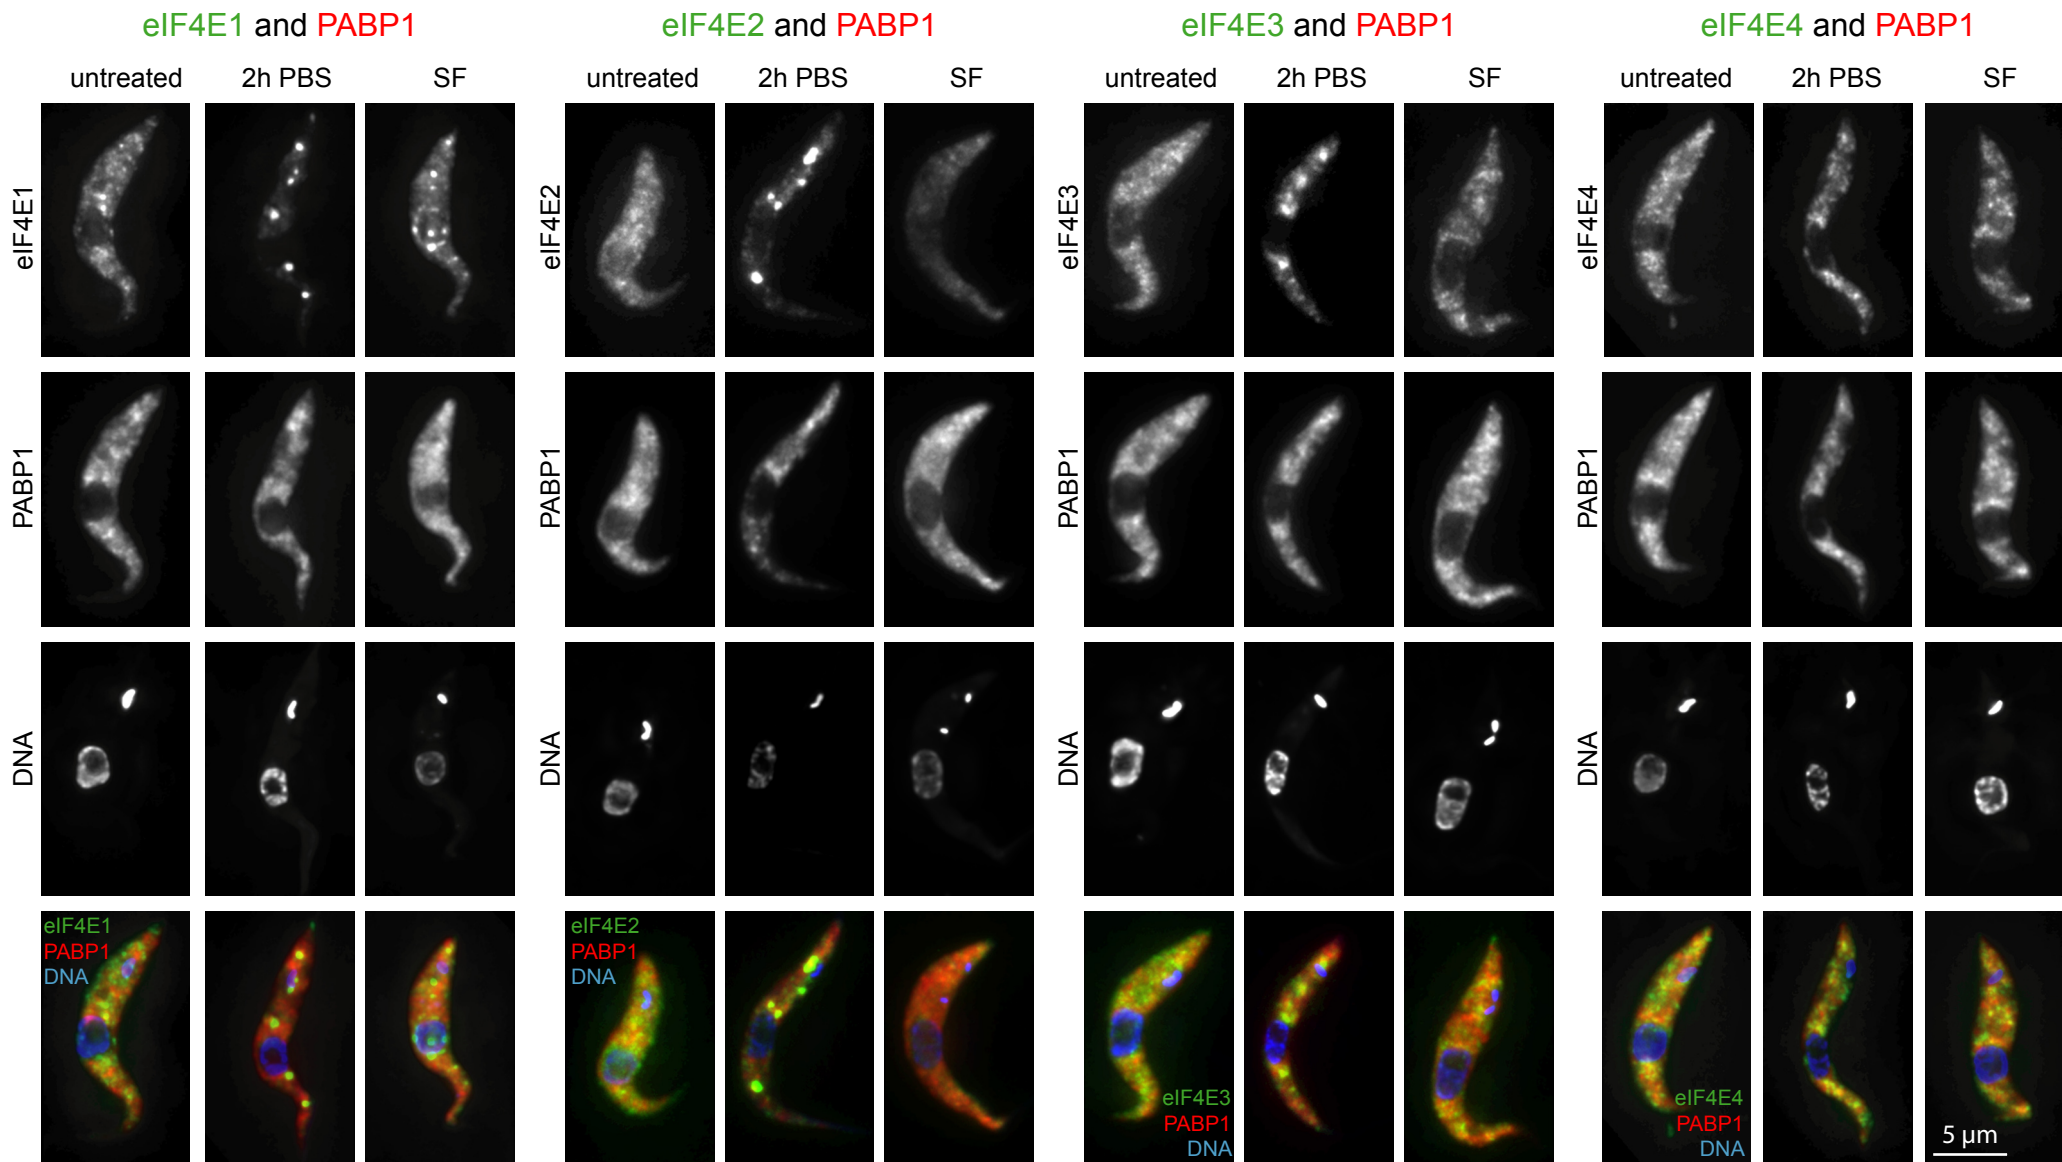

Figure S9B

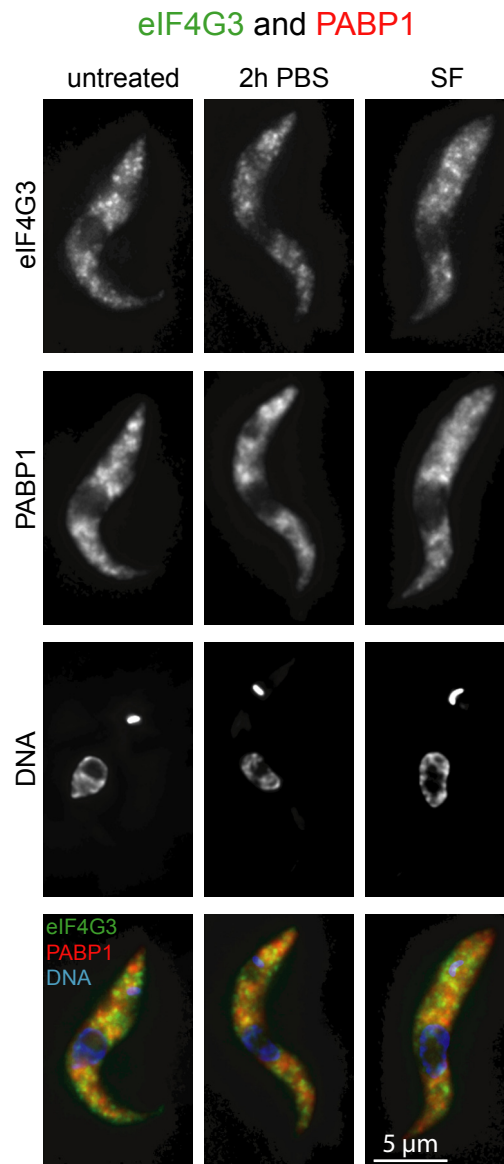

**Figure S9: Differential localization of translation initiation factors eIF4E1-4 (A) and eIF4G3 (B) to inducible RNA granules.**

Both proteins were expressed as eYFP fusions in a cell line also expressing PABP1-mChFP.
