# Supplementary material for: Differential Localization of the Two T. brucei Poly(A) Binding Proteins to the Nucleus and RNP Granules Suggests Binding to Distinct mRNA Pools
Source: PubMed Central journal article supplement (PMC3559699; doi:10.1371/journal.pone.0054004), 2013-01-30
Supplement: pone.0054004.s010.pdf [file pone.0054004.s010.pdf]

**Table S1: Sequences used in the phylogenetic reconstruction of PABP in the Excavates.**

>Tthe1

MTTATQEEITPTVPVTKPLQVASLYVGDLDPAINEPQLVELFKPYGTILNVRVCRDIITQORSLGYGYVN  
FDSPEAAKAMESLNFKRIGEKCVRIMWQQRDPALRYSGNGNIFVKNLKNEVDSRALSILFKKFGDILS  
CKVMEDEGGKSRGYGFVHFVEDDAKDAITNMNGDKENADEAKSGLYVANFIRRNRALALVANFTNVY  
IKQVLPVTDKDIIEKFFSKFGGITSSATCKDKNGRVFAFCNFEKHDDAVKAI EAFHDQVIEGVTAPGEK  
LYVQRAQPRSERLIALRQKYMOCQSLGNNLYVRNFDPDFTEKNLHELFEYGEIRSCRVMTDANGNSRG  
FGFVSFENADQANAALREMNGRMLNGKPLIVNIAQRRDQRYTMLRLQFQQRLQMMRRMHPAPFVAQGP  
GPORRNARNAORGGSGGAGRRHQAPQQAAPAPHPQPD MFSTPSMAFTAQRTPOPSPGVADPTPLPPIIT  
AEDLRTMTVDEQRAALGDRLYIKVFEIAPDHAPKITGMFLEMDLKEAFTLLYNQKLLHEKVTEALCVLK  
AHGTTA

>Tthe3

MDAPLAQRTSSLYVGDLPVEMNPEEVLGRLFGSVGPVASIRVCRDMNTQORSLGYAYVNFQNPADA EKA  
IESFN YTDIIPGHSIRIMPSMRDPI LRRAGINNLYVKIADRSLTARDLRDIFSRYGKILSTKVTCDTNG  
KSLGYGFVQFETAEGAKTALEKSVESLGEAIIAVAPFVRKAERLAQEEKFFVNVYVKNIKPGTTEDEIR  
GEFNKFGELKSLFLSGHPQHQT MFCILSFLTHDAAVA AIEAMHNSVSSPILLPDSKLFVCRALKKRDRQ  
EIAQSSQTLYQSQRNLYIKHLDESVTREKLEELFSPFGKIVSCVLMKDASGVSREFGFVCFEAKEIAD  
TALREMQNGKTVFGKPLVYSYAEQKDMRSRILHEKIQRMIRQQHQRTMPMTILSKPWTRNYPANSVFRP  
PFMQPFHARRQPPHPPPPMFM TSSMQTPPPPPPPVPSQLMNHGTNRYYTQPHFPVPLPPPPPPPI  
HSAQQVWQGANREALRESHLSNLSPEEKRNILGERLFSKVM EIQPNQAAKITGM LLEMETA EILEILNT  
SSLLTAKVEEAIIVVLRQHTNRV

>Tthe2

MSTFPAASPSIWVGGLDPNLNEQKLYDHFVVRVGPVASVRVCDVSATQKSLGYGYVNFQNPADA EKALDQ  
AGVKLGSKHIRIAKIQRDP SKRRSGVTNI VVKLPPAVD TYALKEMFSKFGRLTAIGLATNENGESRGY  
ARISFEKEESAVEAVQEVNGMTIDDCVITVERYQPHHREEQLKQYTNLYVKNLDPV DDEKLETFSAF  
GEVTSAKVRNLGPSQTVGFAYVAYATHEAAA KAVEELDEKESPLAKEGLKLSVCRFRSREERQRERERL  
RRERQQH SKYPNLYVKNFDDTVTSSRLKEVFERFGETVSVSVMMDKATKLSRCFGFVSFKEQSSAARA  
IQELHGSTVLGPRPLFVTYALRKDARRQ TLEDIRNKQPRMRQPPMGGLMGGMMGPQLGFMGPQTMFNGV  
PFVNPRMPMPMATMGMGAPIRPLGPTPMNQVRARPAPQRVPMQMMAAPQPQPAPQGNLSTVLANLT  
PEQQKNVLGERLYNYIVRVNPSVAAKV TGMLLEMDNSEILNLLDNPALLDTKVQEALDVLNRHMNV

>Tcar1

MTTSTDEEVIQAVPIANTLRVASLYVGDLDPVIDEPQLVEIFKSYGTILNVRVCRDIITQORSLKYGYVN  
FDSHESA AKAMEELNFKRFGEK CIRIMWQQRDPVLRYSANGNIFVKNLKNEVDSGQLHLLFKKFGDILS  
CKVMEDEEGKSRGYGFVHFVEDDSAKKAIENMNGDKEIADKEKEALYVANFIRRNLRLAALVANFTNVY  
IKQVLPVTDKDIIEKFFSKFGGITSSAALKDKNGRVFAFCNFQNHDDAVKAI EAFHDQNVVDGITPPGEK  
LYVQRAQPRSERLIALRQKYMOCQSLGNNLYVRNFDLEF TDDNLYELFKEYGVIKNCRVMTDANGNSRG  
FGFVSFENAEQANAALREMNGRMLNGKPLIVNVAQRRDQRYTLLRVQFQQRLQMMRRMHSVPFALHGP  
POQPQHSRGRMGAPRGTRNHAPLHTPPPTQSQVQAQAQAQTHVQEMFTTPSMGFAAPRTPQASPGVA  
PETPPLPPIITADDSLHMSTDEQRAALGDRLYIKVFEIAPDHAPKITGMFLEMDLKEAFALLSNQKLLHE  
KVTEALCVLKAHGSAA

>Tcar2

MSSFPKESPSIWVGGLDPNLNEQKLYDHFVHVGP IVSVRVCDVSVTQKSLGYGYVNFQNLSDAEKALDQ  
AGMKLGSKHIRVAKIQRDP SKRRSGVTNI VVKLPHLTDTEYLKQMF TPFGR LTAIGLATDEKGESRGY  
ARISFEKEESA IQAAQEMNGTTIEDSVITVERYQPHHREEQLKQFTNLYVKNL DSSVDDEKLEKVF SKF  
GEVTSAKVREIQONPGAGFAYVAYATHEAAA SAVEELDEKESPLAKEGMKLSVCRFRSREERHREHERL  
RRERQQH SKYPNLYVKNFDDTVTDERLKELFERFGETVSVRVMIDMATKTSRCFGFVSFKEQSSAARA  
VQELHGSTYL GPRPLFVTYALRKDARRQ TLEDMRNKQPRMRQPPIGGMMGGMMGAQIGFMNPQSMFNGV  
PLMNPRMPMPMAAMMGAPIRPLGPTPMNQVRARPAPQRPLMQPLMQPQPQAPAQGNLSTVLASLSP  
EQQKNVLGERLYNYIVRVNPSVAAKV TGMLLEMDNGEILNLLDNP SLLNTKIQEALDVLNRHMSV-  
RTTNGLAAGWRSSMECNPLQDRNHI GEDVFRK

>Tbor1

MSVEEITPTTQVIEQKPSITSIYVGDLSPEVDEPDLELFLKTCGIVLGVRI LRDLTRRS LGYGYVNFQ  
NAAEA EKALET LNFKTVKNCNIRLMYQQRDP TTRYNGSGNIFVKNL DKGKVD SKSLHEIFNKFGSILSCK  
VMSNADGSSRGYGFVHFKDDSQASEAICKMNGNENAAENAALYVAQFIRRNNRI AALMANFTNVYIKQ  
VLPNVDKDIIEKFFSKFGGIT SACAQDSKGRTF AFCNFSNHEEAVKAI EEVHDKPIDGLTSPDDSIYV  
QRAQPRNERLVELRAKSMQRQSLGNNLYVRNFGPNFTEKQLRELFGEYGD I KSCRIMTDDKGT SRGFGF



KLYVQRAQPRSERLIGLRQKYMQSQSLGNNLYVRNFDPDFTDASLRELFKEYGDIKSCRVMTDANGASR  
GFGFVSFSNADEANAALREMNGRMLNGKPLIVNIAQRRDQRYNMLRMQFQQRLQMMMQIHQQQQQQMP  
FVAGPSQQQQQPRGGMRGRSGRHQQGRGHQPMPMPSPQQQPAFGTQPSAAGLASPTPKQSPGTAPETPP  
LPPISPEELFAMSPDEQRAALGDRLYIKVYEMSPEYAPKITGMFLEMMEKAYELLLNNHKLMTDRVTEA  
LCVLKAHDRA

>Pdav3

MAVGPQRTSLYVGDIPIDLPHPEDAINSLFNSVAPVVSRLVRCRDMNTQKSLGYAYVNFQNNNTDAEKALD  
ALNFTEIVPGREIRVMFSIRDPIIRKSGANLVCVKLDPVTAKTALHNTFMTFGRVLSKIASDENGKS  
KGYGFVQFETPEAAKAALDMDGKKIGASEVVVVPYMRRESERAELEKTFTNVFAKNISAKVSDDDVKAA  
FEKFGIEIETIFVSTHAQHETKFALVTFAKHESAVESIEKLNNGNTEAPLADGEAALYVCRAMKKSERSRM  
KRKAPSLYQSQGRNLYVKHLPDSITKEELENLFTPFGKITSCALMKDSTSGVFRGFVFCDEKESAVA  
AMREMNGKSLPDSKNPLYVSQAEQKDMRLRLLOQRRAAFKNQORMAPPMMGMFGQQWGRQYPMMPMYGA  
MPVPPFLGAPMPMGRAMPMPPPQRPPLNMHNMHNMHNMHNMPNRYTQPRPQPQPMNHQPASGGLD  
AAQLAAMGNEERNLLGETLYNRIVTMNPQQAAKITGMLLEMGTTEILEVLEDENALRAKVSEAISVLQ  
HHTTN

>Pdav2

MAFSGPNPSIWVGGLDPELTETNLYEYFIRIGPVASVRVCVDATTQKSLGYGYVNFQDPADAEKALDQA  
GSKLGSSYLRVAKVQRPDAKRRAGADNIVVKKLPASIDTFALKEMFSKFGRLTAIGLACDEKGESRGY  
ARVSFEREESAADAVKEMNGMEVDGQAIIVVERFQPHRDELLKKYTNLYVKNLNPATISDELREFFNKY  
GETTSAKVHDVSSKSDVGFYVAFDKHEDAACAVEELNGKECEISKEGLTLDVSRFRSREERQRDRER  
QRRERAQQFSKYPNLYVKGFDDSVTSDRLKELFERFGETVSVTVMFDRDSGLSRCFGFVSMRDQNAASK  
AIQELNGSTFLSPRPLFVTYALRKDARRANLEERSKQHRMRNQGAGPMNMPMGFMGQQMPFGMNMPP  
MNPMPMPMGAMGPGMPRMPGMPGPNPMNQMRAGRPMAPRPPVQPMIPPOHQPPTQSQNLSSVLAN  
LNPDOQKNVLRGERLYTHIVRSHPSLAAKITGMLLEMDNGEILNMLDNPALLDSKIAEAQDVLNRHMND  
SL

>Pser1

MATAQVETPAQPEQPIQIASVYVGDLDQNIETEPQLVDLFXSFGTILNVRVCRDIITQORSLGYGYVNFNS  
HEDAKKAIETLNFKRVGDKCIRLMWQQRDPALRYSGSGNIFVKNLGEGVDSKALNDIFQKFGAILSCVK  
MLDEQGGKRSRSGYGFVHFVDENAAKTAIEQMNGSTEHANA EKHALYVANFIRRNARLAALVANFTNVYIKQ  
VLPDVKIEIESFFSKFGGITSATTCKDKSGRVFAFCNFEKHDEAVKAI EALHDNHVEGITAPGEKLYV  
QRAQPRSERLIALRQKYMQFNSLGNLYVRNFDPNFTSDNLHELKELFKEYGEVKSRCVMTDSTGVSRRGF  
VSFATPDQANAALREMNGRMLNGKPLIVNIAQRRDQRYTMLRMQFQQRLQVMMRQIQHRGPPFEGNPAR  
PARNGRGGRSWQQPQPPQPPQIQQQIQQQMQQAMPHAQARPGAGVPMPPPHPTPSATGFSNPTPRLS  
PGQAPDTPPQPIPTPAELSAMSPEEKRAALGDRLFMKVYEVSPFAPKITGMFLEMKPMDAYELLVDQK  
RFTDHSVTEALCVLKAHNCA

>Pser2

MTFSGPNPSIWVGGLDLSLNEQKLYDYFVIRIGPVASVRVCVDSATQKSLGYGYVNFQDPADAEKALDLV  
GSKLGNRYLRIAKIQRDPAKRRSGASNIVVKKLPATIDTYALKEMFSKFGRLTSIVLACDEKGVSRGYA  
RISFEREESAVEAVKEMNGTEVDGQPIILVERYQPQHHEELIKQFANLYVKNLNPSTDDQLREFFSKYG  
NHTSAKVRLDGEIKTDVGFYVAFGEHDDAVKAVEALNGKECEISQKGTALDVSFRFRSRGERMRDLERQ  
RHERAKQYMNYPNLYVKGFDETVTSERLKELFESYGETISVRVMMDESETGLSHCFGFVSMKDHA AAAQ  
AIQMLNGSTFLSSRPLFVTYALRKDVRRQNL EERSKQQFRIRQNHMGGGGAGGMPPSIGFMGGGPKI  
FGNMSMPFMNPRMPMMAAAAAGGFGMGRPMGGGPAPMNQMRVARPMGAQKPPMHAMVPQHYAQQAPPS  
QSLSAMPLPNLTPDQQRNVLGERLYSYIVRSHPFLAAKVTGMLLEMDMTEIVNMLENPTLLDNKISEALD  
VLNHHMGV

>Pser3

MSFVPSQRTSLYVGDIPDLPLYPEDTLSSSLFNSVAPVISLRVCRDITQKSLGYAYINFSNTADA EKAL  
NVLNYTDIIPGRQIRIMFSMRDPMIRKSALNNVCITNLSPSINAKALHKLSEFGSILSCKVALDKDGN  
SKGYGFVQFETPEGAKSALQMSGRRIGDMEVNVVPMRKSERDAQREKTFTNVYANNILKTATEEDVKK  
VFEKFGKVTSLFLSGEPKHNTKFALANFESHDDAVKAI EGLNNSTECEISDPEQPLMVCRALKKSERAR  
VKPKFPAYQONQGRNLYVKHLADDITQEELLENLFAFYGQIESC

>Egra\_a

MATQPPQPNASLYVGDLP AEITEAMLFDLKFVAVGPVLSIRVCRDAVTRRSLSYAYVNFQNPVDAERAL  
ETLNYHQIKGSPIRIMWSHRDPSLRKTGSGNIFIKNLHKSIDNQTLYDTFSQFGNILSCKVATDPNGES  
RGYGFVHFSEESAKAAIEKVNGLMLLKSQVVFVGFVRRALRIQEHAGSYTNVYIKQVKTGIT EEEISG  
FFGKIGPIESHVLKHDRKDRPFVDFKNHDDAVKAVTEFHDKEIEGITTEEGQKIYIGRAQKGERLEE

QRKRVSQLRARKMHEYSGSNLYVKNLDDNVDDAGLKAAFEKFGFEITSAKVMMDDVNPGLSKGFGFVCFK  
DAESANKAISSEMNGHLLGVKPLYVNVAQRKEVRRATLEVQYARMTRMPGPSVPSAGGQPMGYPPMPY  
PTPGYSAFPSPSGSYFYPPGPAAPQRAAMTQAPKWAQQOQIPGMFPFGMSLQQAQMPMRPPQOQAGL  
ARRVMPGQGRAPAPPQMRGRLAGKGLPRGIPPPQARPLAPPSALPPPGLRGPVDDTLASAAALLDMAPD  
QQKNALGERLFARISTSQPEYAAKITGMLLEMDVTECLNLLLESPEVLDSKIAEALAVLQAHDSPDQD

>Egra\_b

MSLTQNASLYVGDLPDITEAVLFDLFAVGPVLSIRVCRDIVTRRSLGYAYVNFQNPADAERALETLN  
YHVIKQOPIRIMWSHRDPSLRKLGIGNVFIKLNHPSIDNQTLYDTFSQFGNILSCKVAVGNGESRGY  
FVHFSEESSRAAIEKVNGLMLLKSQVYVGFVVKRSIRTHQNAQTYTNVYIKNLKKGITTEEQFSEFFGK  
FGEIKSKALRQDREGRPFQFADFGAHEQAAKAVEECHGKFIIEVTQEEQTLVQRFQKSERLDEMQR  
ARLQARARKMHEYSGSNLYVKNLGEVINDESLKEAFKFGKITSAKVMMTDGTPSLSKGFVCFEDSEA  
ANKAISSEMNGYMLGEKPLYVNVAQRKEVRQATLEVQYASRMSRLAGQVPAQQOQAGMGYPPMPYPPGAF  
YPPAGPSMYMYAGQPPRPGMIPGAAPKWAQPMQOIPGMMMAQQMLPGQPPMMGRLOQOIPPGKGRPTPG  
KGLPVPGRGPPLGLGKGVVKGQPLPGPQPSLAFTRQARNKDGAGVAVVDQPLTSSELAGMAPEQQKN  
ALGERLFARISSETQPEYAAKITGMLLEMDVTETLNLLLESVDLTEKINEALTVLKAHEGSLTE

>Egra\_c

MATTRVPPPVGQOTALYVGDLDNHVTEAMLFEFFKQAGPIVSIRVCRDSATRRSLGYAYVNFQSSD  
TCLTLNYTSFKGRPCRIMWSQRNPTLRKSNKGNIFIKSLHPQIDHKALYDTFSAGPVLSCVVLKPN  
GESAGYGFVHFDSDEAARLAVEKVNGLSNGKIVFVGFERRANRLELHKQKFTNIYIKHLKSEVTKEK  
LDEVFSKFGAIRSSLVATKDDGSSKGFVFNVEEHDASVKAIDELHDSSEQNFDSLPSKTLVTRHQ  
RLSEROHLREQWAKERQORLAKYVNLVKNLDDNIDDAKLKEFFEPFGTIISAKVMRDEQSGASRGFGF  
VSFRDSEAAANKATAEMNNKLGISSKPLYVGPQKKEERRLOLEMQFAQRTKAGLFTGPALSSAPLTATA  
QAFNPTGYLPTASPALPLGOAHASFLQMQGQRPSGPRWSTEQALGRMPQAMGPPRGRVPMMPGPAASAY  
AAQARFQMQRPPPKSTPYPAQPLFGGRPFTTAPHMVPPQARAPVPAMRSTEDPTLTNEYLAGLPVDQ  
QKNLLGERLFSYIDRDYDPLAAKITGMLLEMEPREILGLLGOPELLGSKVSEALEVLKRHPPEMQAAKN  
LE

>Tbru1

MTIAAQVPSGPSATKPLQVASLYVGDLDPAINEPQLVDIFKPYGTILNVRVCRDIITQORSLGYGYVNY  
DDVNSASKAMEELNFKRVGEKCIIRIMWQORDPALRYSGSGNIFVKNLKEEVDSRELSLIFKKFGEILSC  
KVMDDDESGRSGYGFVHFKDDDAKAAIEKMNGDKEHADADKAALYVANFIRRNARLAAALVANFTNVYI  
KQLLPTVDKDVIEKFFSKFGGITSAAIKDKNGRAFAFCNFEKHDDAVKAI EASHDQEVEGVTQPGKEL  
YVQRAQPRSERLIALRQKYMOCQCSLGNLNVYRNFDAEFTEKDLNELFKEYGVI RSCRVMTDANGISRGF  
GFVSFENADQANAALREMNGRMLNGKPLVNVIAQRRDQRLTMLKLQLQORLQMMHMHMPFPMPGHP  
LORRNARSGGRNRPHPROQOPQPEPQPLATTVPAAAHSVMFTAPSMGFSAPRTPQASPAIAPD  
TPPLPPI SAEDLQOMSVDEQRAALGDRLYIKVHELAPDHAPKITGMFLEMNPKEALALLSNPKLMHEKV  
TEALCVLKVHASSA

>Tbru2

MAFAAASPSI WVGGLDPNLNEQKLYDHFVRVGPVAVSVRVCVDSVTQKSLGYGYVNFQNPADA EKALDQ  
AGVKLGTKHIRIAKIQRDPSKRRSGVTNIIVKKLPPPTVDTYALKEMFSKYGRRLTAIGLATDEKGESRGY  
ARISYEKEESAVDAVRELNGVSI DDCAITVERYQPHHREEQLKQYTNLYVKNLDPV DDEKLKEVFSF  
GEVTSAKVRDLAGRPTVGFVAYATHEAAA KAVEELDDKESPLAKEGMKLSVCRFRSREERKRERERL  
RRERQQH SKYPNLYVKNFDDTVT SERLKALFDPFGETVSVSVMMDKATKVSRCFGFVSFKEQSSAAQA  
IQELHGSTALGPRPLFVSYALRKDARRQTLEDMRNKQPRMRQPPMGGLMGGMMGPQLSFMNPPAMFNGM  
HFMNTRMPMMPSTMGMGPMRPMGPTPMNQVRARPGQRPPMQSMMAPQQQSHQIIPQPPVAQGNLST  
VLASMTPDQQKNV LGERLYNIIVRN NPSFAAKVTGMLLEMDNSEILNLLDNHSLLDTKVQEALDVLNRH  
IGM

>Lma j2

MAFTGNPNSI WVGGLDPLDQEQKLYDYFVRI GPVTSVRVCVDSATQKSLGYGYVNFQDPADA EKALDQA  
GSKLGSRYLRIAKIQRDPSKRRSGVNNILVKKLPKSVDTYALKEMFSKFGRLTAIGLACDEKGESRGYA  
RISFEREESAVDAVREMDGEMDGOAIVVERYQAQHRDELLKQFTNLYVKNLDPAVTDEKLRAFFAKYG  
EVSSAKVRDLGAAQSEAGLGYVAFQKHENAARAVEELNGKECEIAKAGSPLDVSRFRSREERQRDRERQ  
RRERAQQH SKYPNLYVKGFD DTVT SERLEELFQRYGETVSVTVMMDKETGVSRCFGFVSMKDQNAASQA  
IQELNGSTFLSPRPLFVTYALRKDARRQNLEERSKQFRVRQNPMMGGPMMGAMPPIGFMGPQMFNNVNM  
FMNPRVPIMPMMNGMNGIGGMNGMGMNGVGGVGGMGMGMGMGMGMGMGMGMGMGMGMGMGMGMGMGM  
APNAMSQMRSRPMPQKPPMQSLMPQQHQAPPQGNLAAVLANLNPEQQKNV LGERLYSYIVRSHPSVA  
AKITGMLLEMDNAEILNMLD SPTMLDSKIAEAQDVLNRHMSV

>Lmaj3

MVAPAQRTSVYVGDLPIDLPRPEEAINNLFSTVAPVVSVKVCRDMATQORSLGYGYVNFQTTADAEKVID  
ALNYTGIAPGRQIRVMF SIRDP LQRKSGMNNV FVKKLD TAINAKELQAAF SKCGRVLSCKVALDSAGNS  
KGYGFVQFETADGTAALEMNGSKLGDSEVVVAPFVRRVDREAMAASFRNIYIKNITASATEADV KAI  
VEEFGKVDSLFLSEHARFPTKFALVAFEEHQAAVQAI AALNESEESGLTEKAVKLVVCRALSKSERDRE  
KKKAASLYQNHGRNLYIKHLPDDITDDRLREIFEPFGKITSCAIMKEPNGTLKGFVFCFEDKQHASAA  
LRSLNGHPLEHSKPLYVSHAEQKDMRIRLLQORRAAMRHQSRMAPLMNTFPQOWPRHPFPHMVPPMMP  
PPPPPNMGMPQFMSGPMIRRPVMEPHLMQGEPMRPPNRYTQAREQYPPQQRQDGVDMNYLSTLSPEQQK  
NYLGELLYSRILPLESSNAAKITGM LLEMSREEIFEILADHFALLSKIQEANAVLQQHTGN

>Lmaj1

MAAAVQEAAPVAHQPM D KPIEIASIYVGDLDATINEPQLVELFKPFGTILNVRVCRDIITQORSLGYG  
YVNFNDHDSA EKAI ESMNF KRVGDKCVRLMWQQRDPALRYSGNGNVFVK NLEKD VDSKSLHDI FTKFGS  
ILSCKVMQDEEGKSRGYGFVHF KDETS AKDAIVKMNGAADHASEDKKALYVANFIRRNARLAALVANFT  
NVYIKQVLP TVNKDVI EKFFAKFGGITSAACKDKSGRVFAFCNFEKHDDAVKAVEAMHDDHHIDGITAP  
GEKLYVQRAQPRSERLIALRQKYMQH QALGNLYVRNF DPEFTGADLLELFKEYGEVKSCRVMVSESGV  
SRGFGFVSFSNADEANAALREMNGRMLNGKPLIVNIAQRRDQRYTIVRLQFQQRLQMMMRQMHQPMPFV  
GSQGRPMRGRGGRRQQLGGRAQGHMPMPSPQQPQGAAPQGFATPSAVGFVQATPKHSPGDVPETPPLP  
PITPQELESMSPOEQRAALGDRLFLKVYEIPPDVAPKITGMFLEMKPKEAYELLNDQKRLEERVTEALC  
VLKAHQTA

>Lbra3

MAAPVQRTSVFVGDLPVDLPRPEEAINNLFSS IAPVVSVKVCRDIATQORSLGYGYVNFQTTADAEKVID  
ALNFTGIAPGRYIRVMFAIRDPLQRKSGANNIFVKKLDAAVSAKALQAAF SRCGRVLSCKVALDSEGH S  
KGYGFVQFETADGAKAALDMNGAKVGDSEVEVAPFVRRVDREAMAASFRNIYIKNIKATATEVDMRTT  
LEKFGKVTSLFLAEHAPFLTKFALAVFEEHEAAVKAIAELNESEESGLTEEAVKLVVCRALSKSERDRE  
RKKTASLYQNHGRNLYVVKHLPDDITDDKLR EIFAPFGKITSCAIMRESNGSLRGFAFVFCFEDKQHATAA  
MRELNGRSLESSK KPLYVSQAEQKDMRIRLLQORRAAMRHQTRMAPPMNTFPQOWPRQPFPHMVQPMML  
PPPPPNMGMPQFMSGPMRRPVMDAHPRQGEPMRPPNRYTYPREQYQPPQPPQPPQPPQDGDIDVNYLN  
TLSPEQQKNYL GELLYSRIMPVESFNAAKITGM LLEMSREEIFEVL RDHFALLAKIQEANAVLQQHSGN

>Lbra2

MAFSGPNPSI WVGGLDPDLQEQRLYDYFVRIGPVT SVRVCVDSATQKSLGYGYVNFQDPADAEKALDQA  
GTKLGSRYLRIAKIQRDP SKRRSGVNNILVKKLPKTVDTYALKELFSKFGRLTAIGLACDEKGESRGYA  
RISFEREESAVEAVKEMDGMEMDQQAIVVERYQAQHRDELLKQFTNLYVKNLDPAVTDEKLRAFFARYG  
AVSSAKVRDLGGVQSEVGLGYVAFEKHEDAARAVEELNGKECE IAKAESTLDVSRFRSREERQRDRERQ  
RRERAQQH SKYPNLYVKGFD DTVT SERLEELFOR YGETVSVTVMMDKETGMSRCFGFVSMKDQNAASQA  
IQELNGSTFLCPRPLFVTYALRKDARRQNL EERSKQFRVRQNP MGGPGMGGMPVGFMGPMQFN SVNMP  
FMSPRVPIMPNGMNGIGGMNGMGGMNGMNGMGGMGGMGT MGGMGGMGRPMAPNAMSQMRSRPMPQ  
KPPMQSLMPQQHQPPPPQGNLAAVLANLNPEQQKNV LGERLYSYIVRSHPSVAAKITGM LLEMDNSEI  
LSMLDSPVMLDSKIAEAQDVLNRHMSV

>Lbra1

MTT TVQETAAPVAQPPQVSKPMQIASIYVGDLDAAINEPQLVELFKPFGTILNVRVCRDIITQORSLGYG  
YVNFNDHHS AERAIESMNFRRVGD KCVRLMWQQRDP SLRYSGNGNVFVK NLEKD VDSKSLHDI FTKFGS  
ILSCKVMEDEEGKSRGYGFVHF KDEI SAKDAIVKMNGAADHASEDKKALYVANFIRRNARLAALVANFT  
NVYIKQVLP TVNKEVIENFFAKFGGITSAACKDKSGRVFAFCNFEKHDDAVKAVEAMHDDHHIDGITAP  
GEKLYVQRAQPRSERLIALRQKYMQH QSLGNLYVRNF DPEFTGADLLELFKEYGDVKSCRVMMS ESGA  
SRGFGFVSFSNADEANAALREMNGRMLNGKPLIVNIAQRRDQRYTMLRLQFQQRLQMMMRQMHQPMPFV  
GGQGRPMRGRGGRRQOQGGRAQGHMPMPSPQQSQGFATPSAVGFVQATPKHSPGQVPETPPLPPIITPQE  
LESMSPOEQRAALGDRLFLKVYEIAPELAPKITGMFLEMNPKEAYELLNDQKRLEERVTEALCVLKAHQ  
TV

>Linf3

MVVPVQRTSVYVGDLPIDLPRPEEAINNLFSTVAPVVSVKVCRDMATQORSLGYGYVNFQTTADAEKVID  
ALNYTGIAPGLQIRVMF SIRDP LQRKSGMNNV FVKKLD TAINAKELQAAF TKCGRVLSCKVALDSAGNS  
KGYGFVQFETAEGAKAALDMNGSKLGDSEVVVAPFVRRVDREVMAAK SFRNIYIKNIAAAATEADV KAA  
AEKFGVNSLFLSEHAPFPTKFALVAFEEHEAAVQAI AALNESEESGLTEKAAKLVVCRALSKSERDRE  
KKKAASLYQNHGRNLYVVKHLPDDITDDKLR EIFEPFGKITSCAIMKEPNGTFKGFVFCFEDRQHASAA  
LRSLNGQPLEHSK KPLYVSHAEQKDMRIRLLQORRAAMRHQSRMVPPMNTFPQOWPRHPFPHMVPPMMP  
PPPPPNMGMPQFMSGPMIRRPAMEPHLMQGEPMRPPNRYTQPREQYPPQQRQDGVDMNYLSTLSPEQQK  
NYLGELLYSRILPLESSNAAKITGM LLEMSREEIFEILADHFALLSKIQEANAVLQQ  
HTGN



PFVNPRMSMMPTPMGMGGQLRPMGPTPMNQVRARPMPQRPPMQPIMAPPPQPQSLASQGQNLSTVLANL  
TPEQQKNVLGERLYNHIVAINPAAAAKVVTGMLLEMDNGEILNLLDTPGLLDAKVQEAEVLNRHMNV

>Tva1

MDPNWKEVFGDLPGSVDENFIKEIFKDYGSFPSTVTVKHKHSLDKSFAFVTFESHELAKRAISEVNY  
TKLDGVP I R I L W S D P G T K R A I K N N V G A L F I R G L D E N I E V S Q L H D A F S N F G E I V S C K I P L T N G K S R G Y G F  
I T F Y K E D D A K R A K T D L A D A S I N G K P I Q I E F Y Q K P T R K N P E E T F T N V F I K P L P A D I F K T D D D L A N F F K E F  
G D F V V T G K A N P A I K R K E D G S S C E F G F C N F K H H E D A V K A V D A L N G K Q H E S G K V T F S C C R A Q T K A E R Q A F L  
A K Q S A E F R R R L N E E T R G R N L Y V K N F D Q S V T D E Q F K E Y F E Q F G E V E K C S I R R E A Q E P H E S K G F G F V L F K T  
K E S A Q N A L E N A V I T P L N G K T P Y I G L F K M K E E R E R E K A S N Q R K Q Q P K G A M I P N T I G G P V I P T Q Q I M M Q S M  
M M P Q V P V S A P A T S K D L L K N E L T E R N I S G S K L K A I L S S I S E E Q A K S L C S D Q E K L N H W V E E K T K M

>Tva2

MATLTTQIFVGDLPKDIDESFLKQFFAESGEIIPNSGIVLKKHKTLDSSFAFVTFATHEQAAMKMLN  
YTKLDGRPIRILWCDTETKAIKSGRGSFLINGLDESIEVSQLHDAFSNFGEIISCKIPLTDGKSRGYG  
YIQFRNPENAEKAKLELADASINGKPIKIDNYNRKSRRNPDDEFNTVYIKPLPVDQVKTDEDLRKIFEP  
FGEIQNP SLK K D E N G S K G F G F C N F K L H E D A V K A V E G L N G Q E M F G V T L Q V N R L M S K R E K E L Y N I K K H T E  
K V E K F A E E T N G R N L Y V K S F S K D V T D K E F Q E Y F S K F G E I E L F K I E R V P E T K E S K G F G F V L Y K S K E D A Q N A  
I E M A M L E R L H G D L P Y V G F F Q T K A A H E R V K V K N T H P R P S A V P A I A G N L M E N S M T T I A R Q Y Q P V E D N S P K G  
Q L K Q L L Q E K G V L G T N L K R L L S S V S A E Q A V N L V K E Q S K F E I W Y S H N A N

>Tva3

MDLNWKELFVGDLPGYVDGNFIKELFREYGNFPSTITVKKHKS LDKSFAFVTFESHELARRALLEVNY  
TKLDGVP I R I L W S D P A T K R A I K K D F C T L I I F D L D E Y I E A A Q L H D I F S N F G E V V S C K I P L T N G K P R G D G Y  
V T F Y K E E D A M R V K N D L A Q A S I N G K P I Q I V L Y C K P T R K N S E E T F T N V F I K P L L V K Y F K T N E D L A K L M K D F  
G E F V N P S I K F N D D G T S S E F G F C N F M Y H Q D A V K A V E S L N G K M H I S G E F E F V C C R A Q T K A E R Q A F L A E Q S A  
E F R R R L Y E E T R G R N L Y I K N I D R S I N D E E F E E Y F K Q F G E V E K C L I S R E A Q E P H E S K G F G F V L F K T K E G A Q  
N A L K N T I I T P L K G K I L Y V N Y F I M K E E R E H I L P M D Q P K T Y L N F I K T K L S E R G F P N K Q K K N S L F N L R R T S  
S R T L Q
