# Supplementary material for: Differential Localization of the Two T. brucei Poly(A) Binding Proteins to the Nucleus and RNP Granules Suggests Binding to Distinct mRNA Pools
Source: PubMed Central journal article supplement (PMC3559699; doi:10.1371/journal.pone.0054004), 2013-01-30
Supplement: pone.0054004.s011.pdf [file pone.0054004.s011.pdf]

Table S2: Plasmids used in this work. Some of the plasmids have been previously described (Kramer et al 2012).

|                              | Gene ID                  | nucleotides of ORF used for targeting / RNAi / expression | restriction enzyme used for linearization | backbone plasmid | backbone plasmid described | expression vector | selectable marker |
|------------------------------|--------------------------|-----------------------------------------------------------|-------------------------------------------|------------------|----------------------------|-------------------|-------------------|
| PABP1-4Ty1                   | Tb09.211.0930            | 592-end                                                   | BsgI                                      | p3074            |                            | p3074             | NEO               |
| PABP1-eYFP                   | Tb09.211.0930            | 123- end                                                  | NsiI                                      | p2710 with HYG   | Kelly 2007                 | p2949             | HYG               |
| PABP2-mChFP                  | Tb09.211.2150            | 537-end                                                   | XcmI                                      | p2705            | Kelly 2007                 | p3279             | NEO               |
| PABP2-eYFP                   | Tb09.211.2150            | 539- end                                                  | XcmI                                      | p2710            | Kelly 2007                 | p3295             | NEO               |
| mChFP-DHH1                   | Tb927.10.3990            | 1-466                                                     | NheI                                      | p2679 with BSD   | Kelly 2007                 | p2845             | BSD               |
| eIF4E1-eYFP                  | Tb11.18.0004             | 162- end                                                  | NruI                                      | p2710            | Kelly 2007                 | p3519             | NEO               |
| eIF4E1-mChFP                 | Tb11.18.0004             | 162-end                                                   | AarI                                      | p3086            | n.d.                       | SK85              | HYG               |
| eIF4E4-eYFP                  | Tb927.6.1870             | 361- end                                                  | BspEI                                     | p2710            | Kelly 2007                 | p3522             | NEO               |
| eIF4G3-eYFP                  | Tb927.8.4820             | 1319- end                                                 | BbsI                                      | p2710            | Kelly 2007                 | p3549             | NEO               |
| PABP1-mChFP                  | Tb09.211.0930            | 123-end                                                   | NsiI                                      |                  |                            | p3071             | HYG               |
| PABP1 ALRQKY::RLRRER         | Tb09.211.0930            | full length                                               | NotI                                      | p2216            | Kelly 2007                 | p3404             | PHLEO             |
| PABP2 RLRERER::ALRQKY        | Tb09.211.2150            | full length                                               | NotI                                      | p2216            | Kelly 2007                 | p3405             | PHLEO             |
| GGHESSVE                     | random sequence          |                                                           | NotI                                      | p4186            | Sunter 2011                | p4255             | BSD               |
| RGHKRSRE                     | NLS of LA protein        |                                                           | NotI                                      | p4186            | Sunter 2011                | p4246             | BSD               |
| RLRRER                       | predicted NLS of TbPABP2 |                                                           | NotI                                      | p4186            | Sunter 2011                | p4190             | BSD               |
| RFRSREERKRERERLRERERQQQHSKYP | predicted NLS of TbPABP2 |                                                           | NotI                                      | p4186            | Sunter 2011                | p4187             | BSD               |
| RSREERKRERERLRERER           | predicted NLS of TbPABP2 |                                                           | NotI                                      | p4186            | Sunter 2011                | p4188             | BSD               |
| RERERLRERERQQQHSKYP          | predicted NLS of TbPABP2 |                                                           | NotI                                      | p4186            | Sunter 2011                | p4189             | BSD               |
| PABP1-NLS of LA protein-eYFP | Tb09.211.0930            | 123- end                                                  | NsiI                                      | p2949            | Kramer 2008                | p3633             | HYG               |
| PABP1 RNAi                   | Tb09.211.0930            | full length                                               | NotI                                      | p2T7-177         | Wickstead 2002             | p2319             | PHLEO             |
| PABP2 RNAi                   | Tb09.211.2150            | full length                                               | NotI                                      | p2T7-177         | Wickstead 2002             | p2287             | PHLEO             |

Kramer S, Marnef A, Standart N, Carrington M (2012) Inhibition of mRNA maturation in trypanosomes causes the formation of novel foci at the nuclear periphery containing cytoplasmic regulators of mRNA fate. *J Cell Sci.*
